# Supplementary figures and images for: COSMONET: An R Package for Survival Analysis Using Screening-Network Methods
Source: MDPI journal article supplement (doi:10.3390/math9243262), 2021-12-15

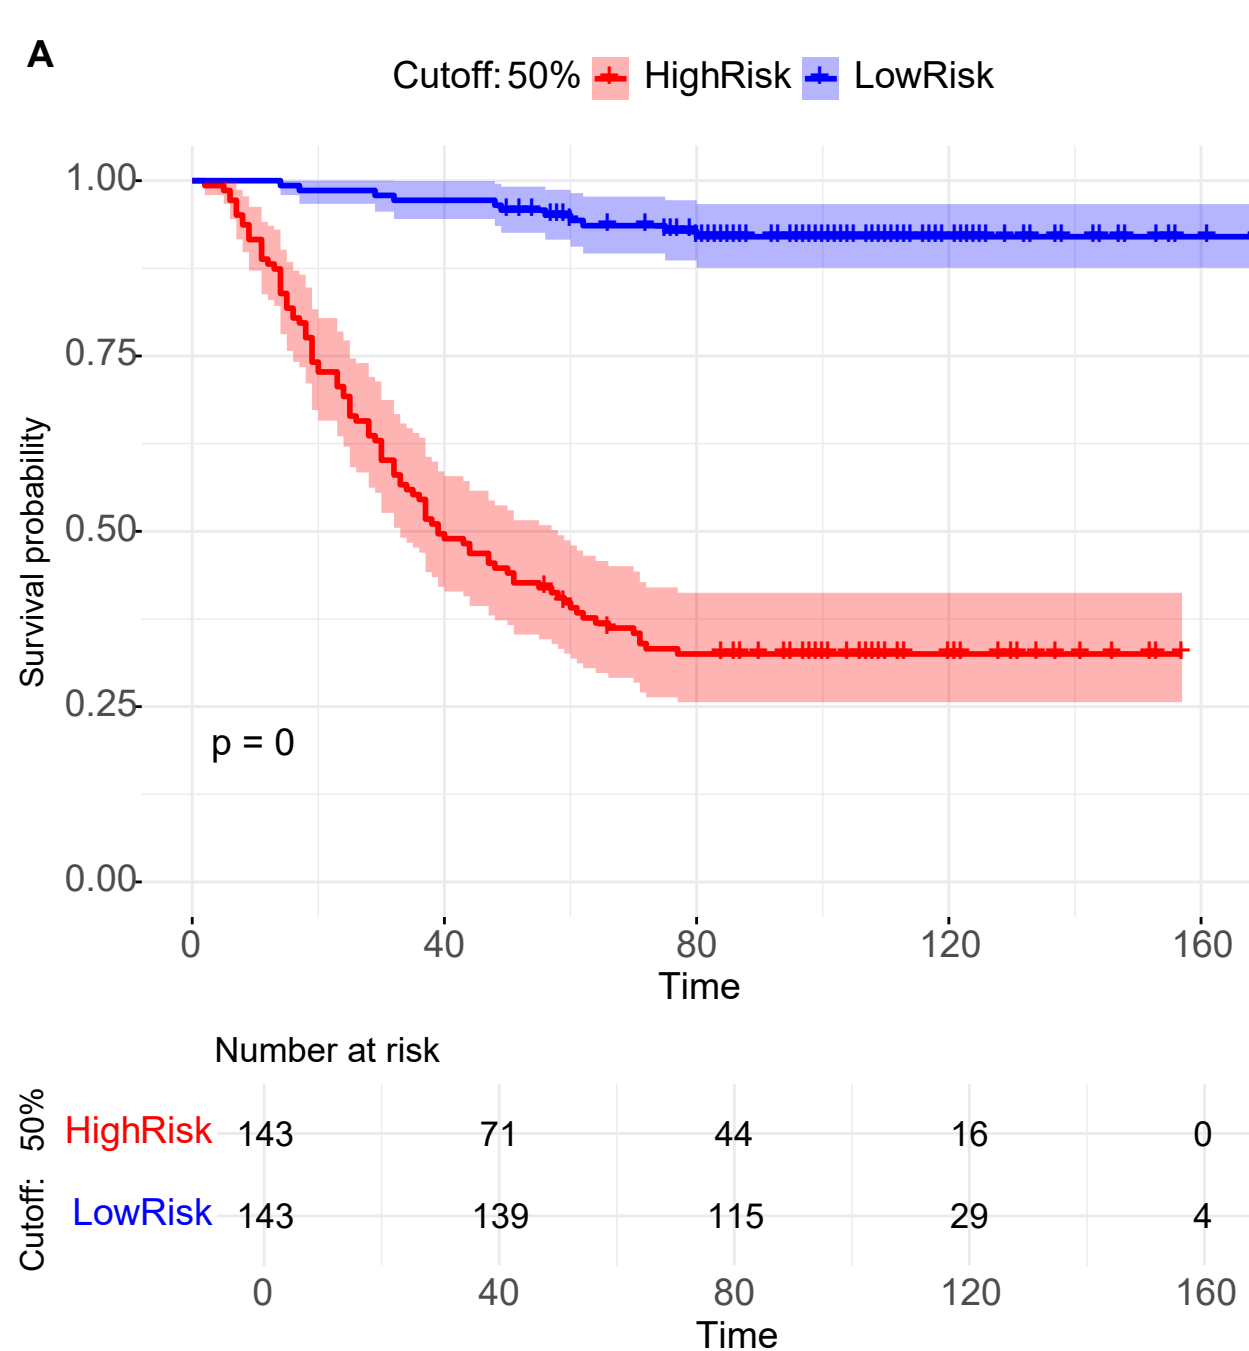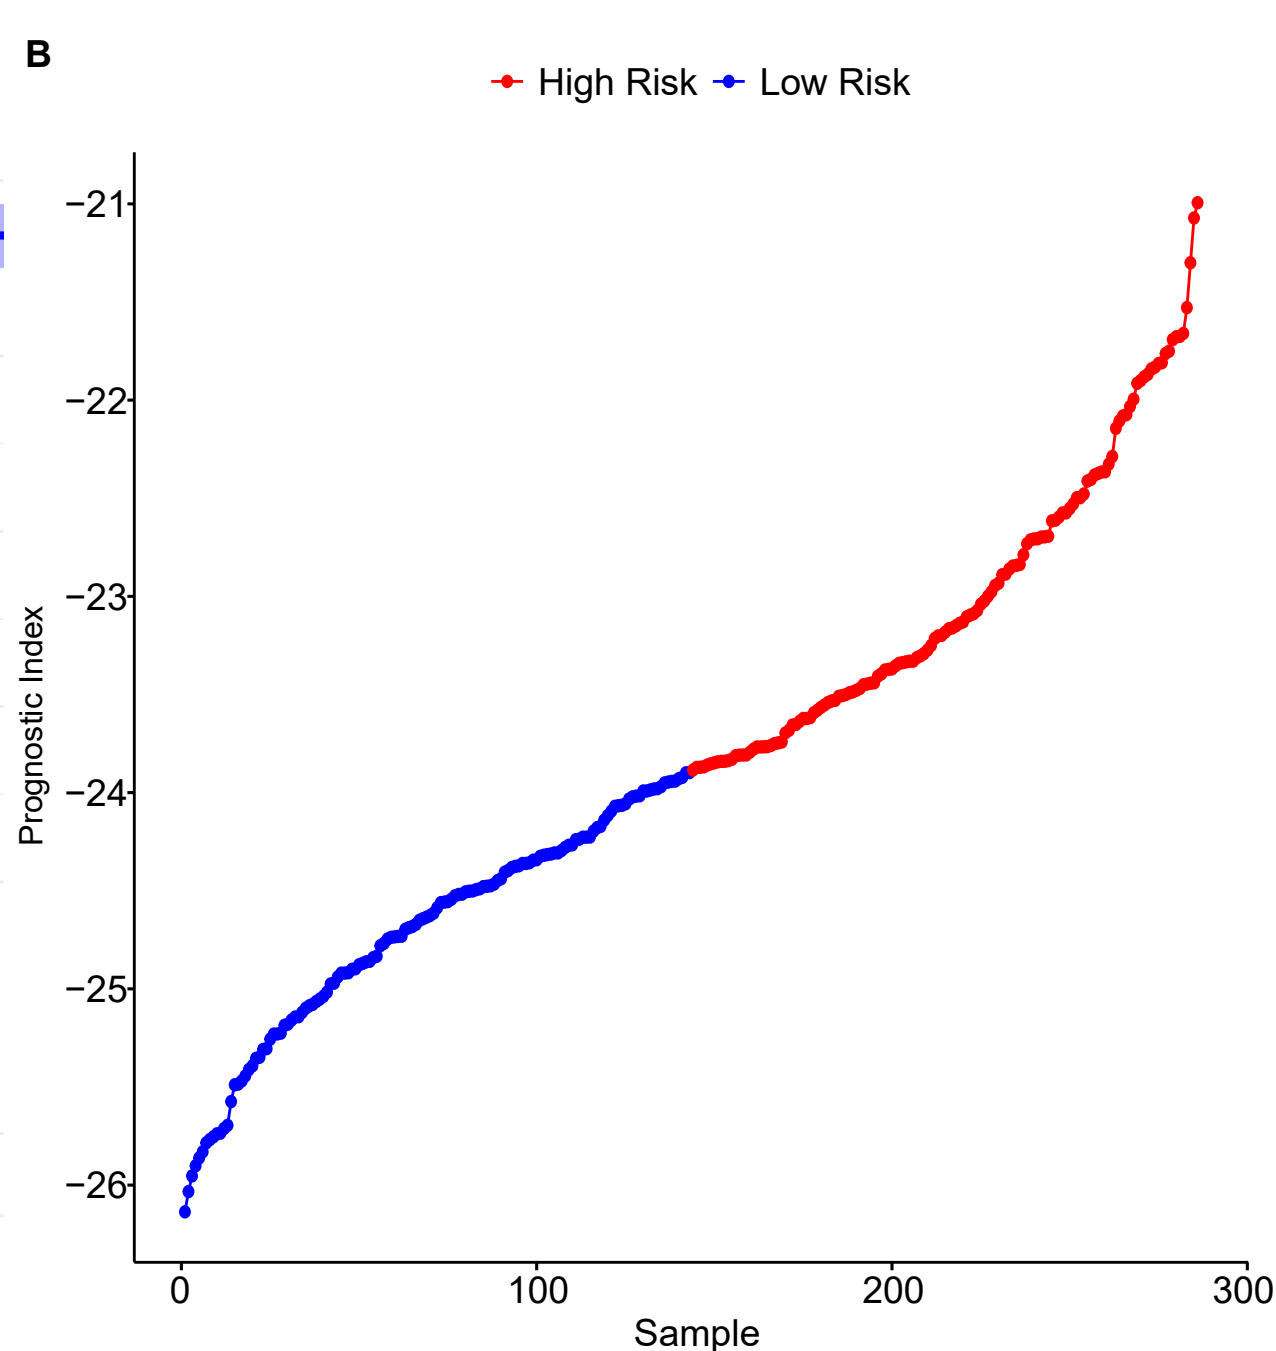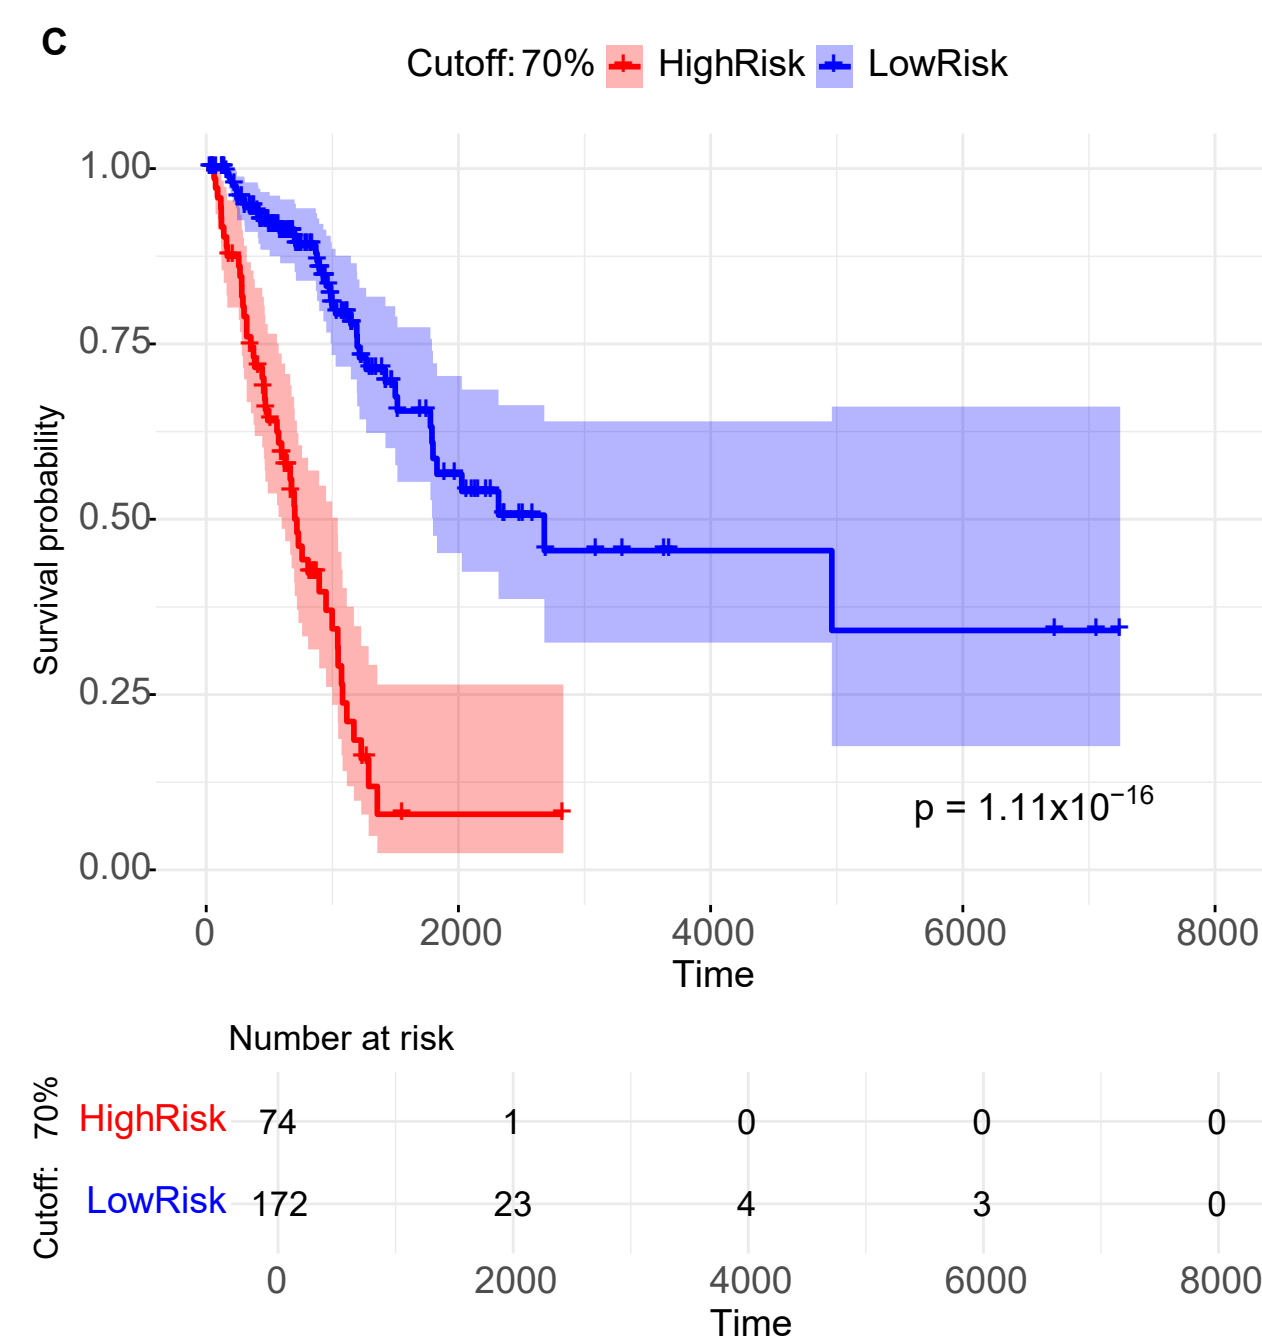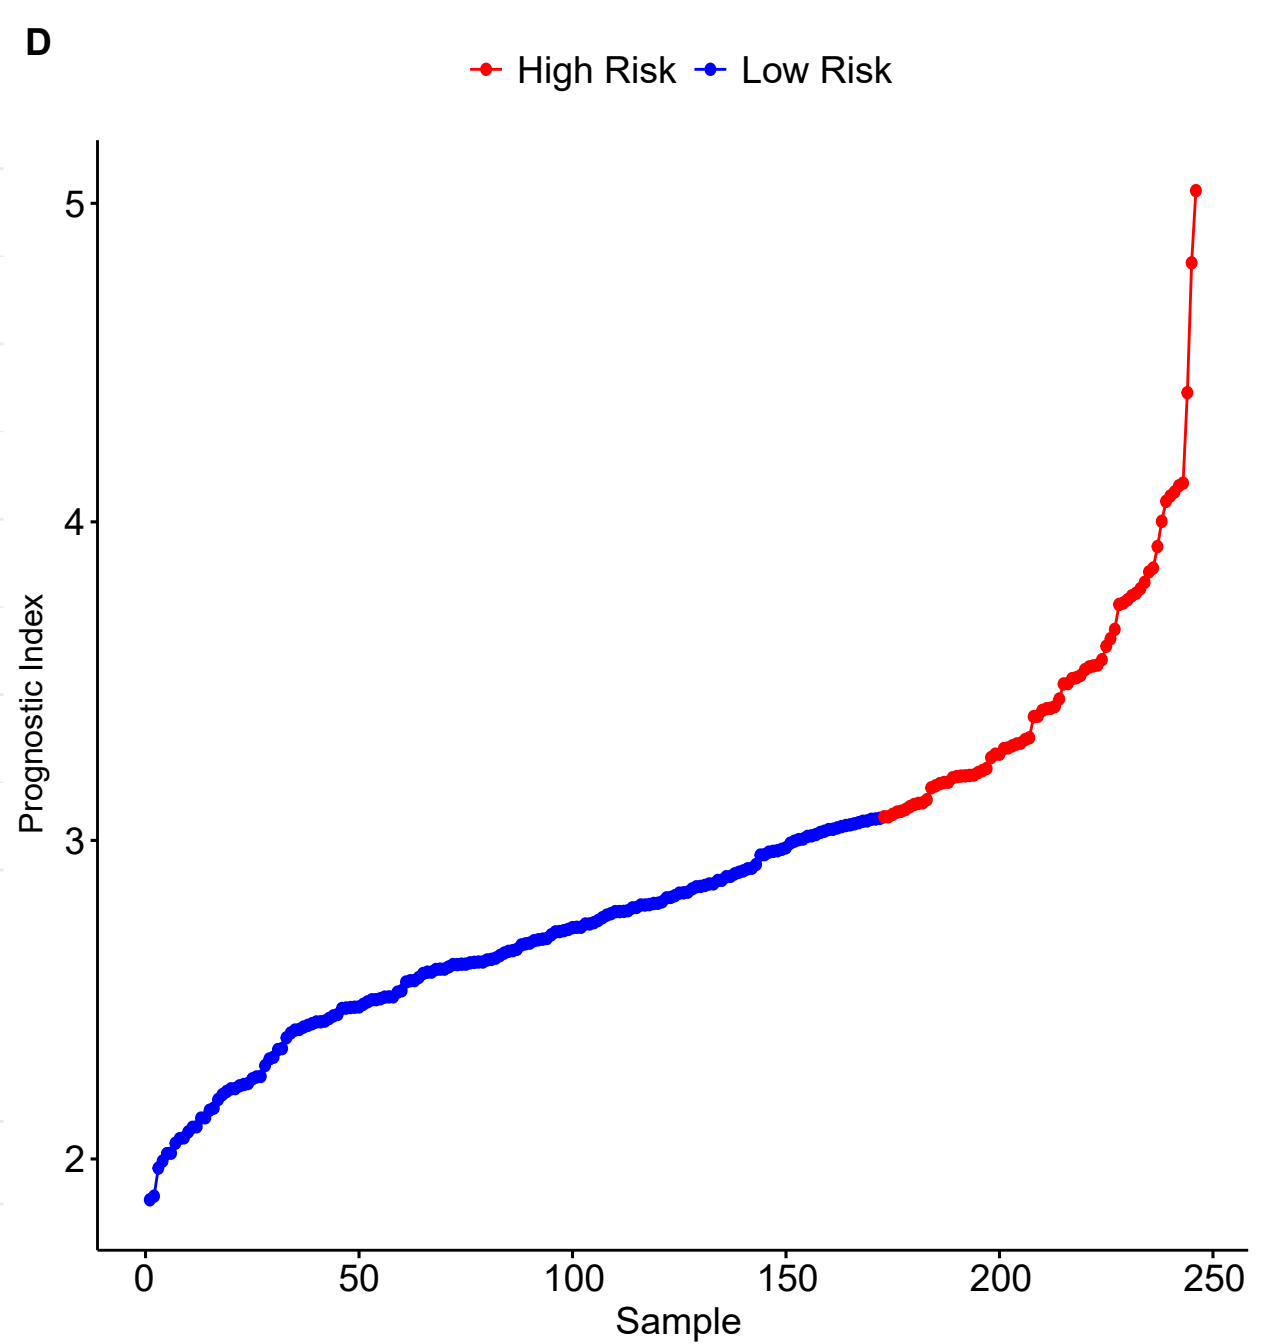

Supplement: s1 [file s1]

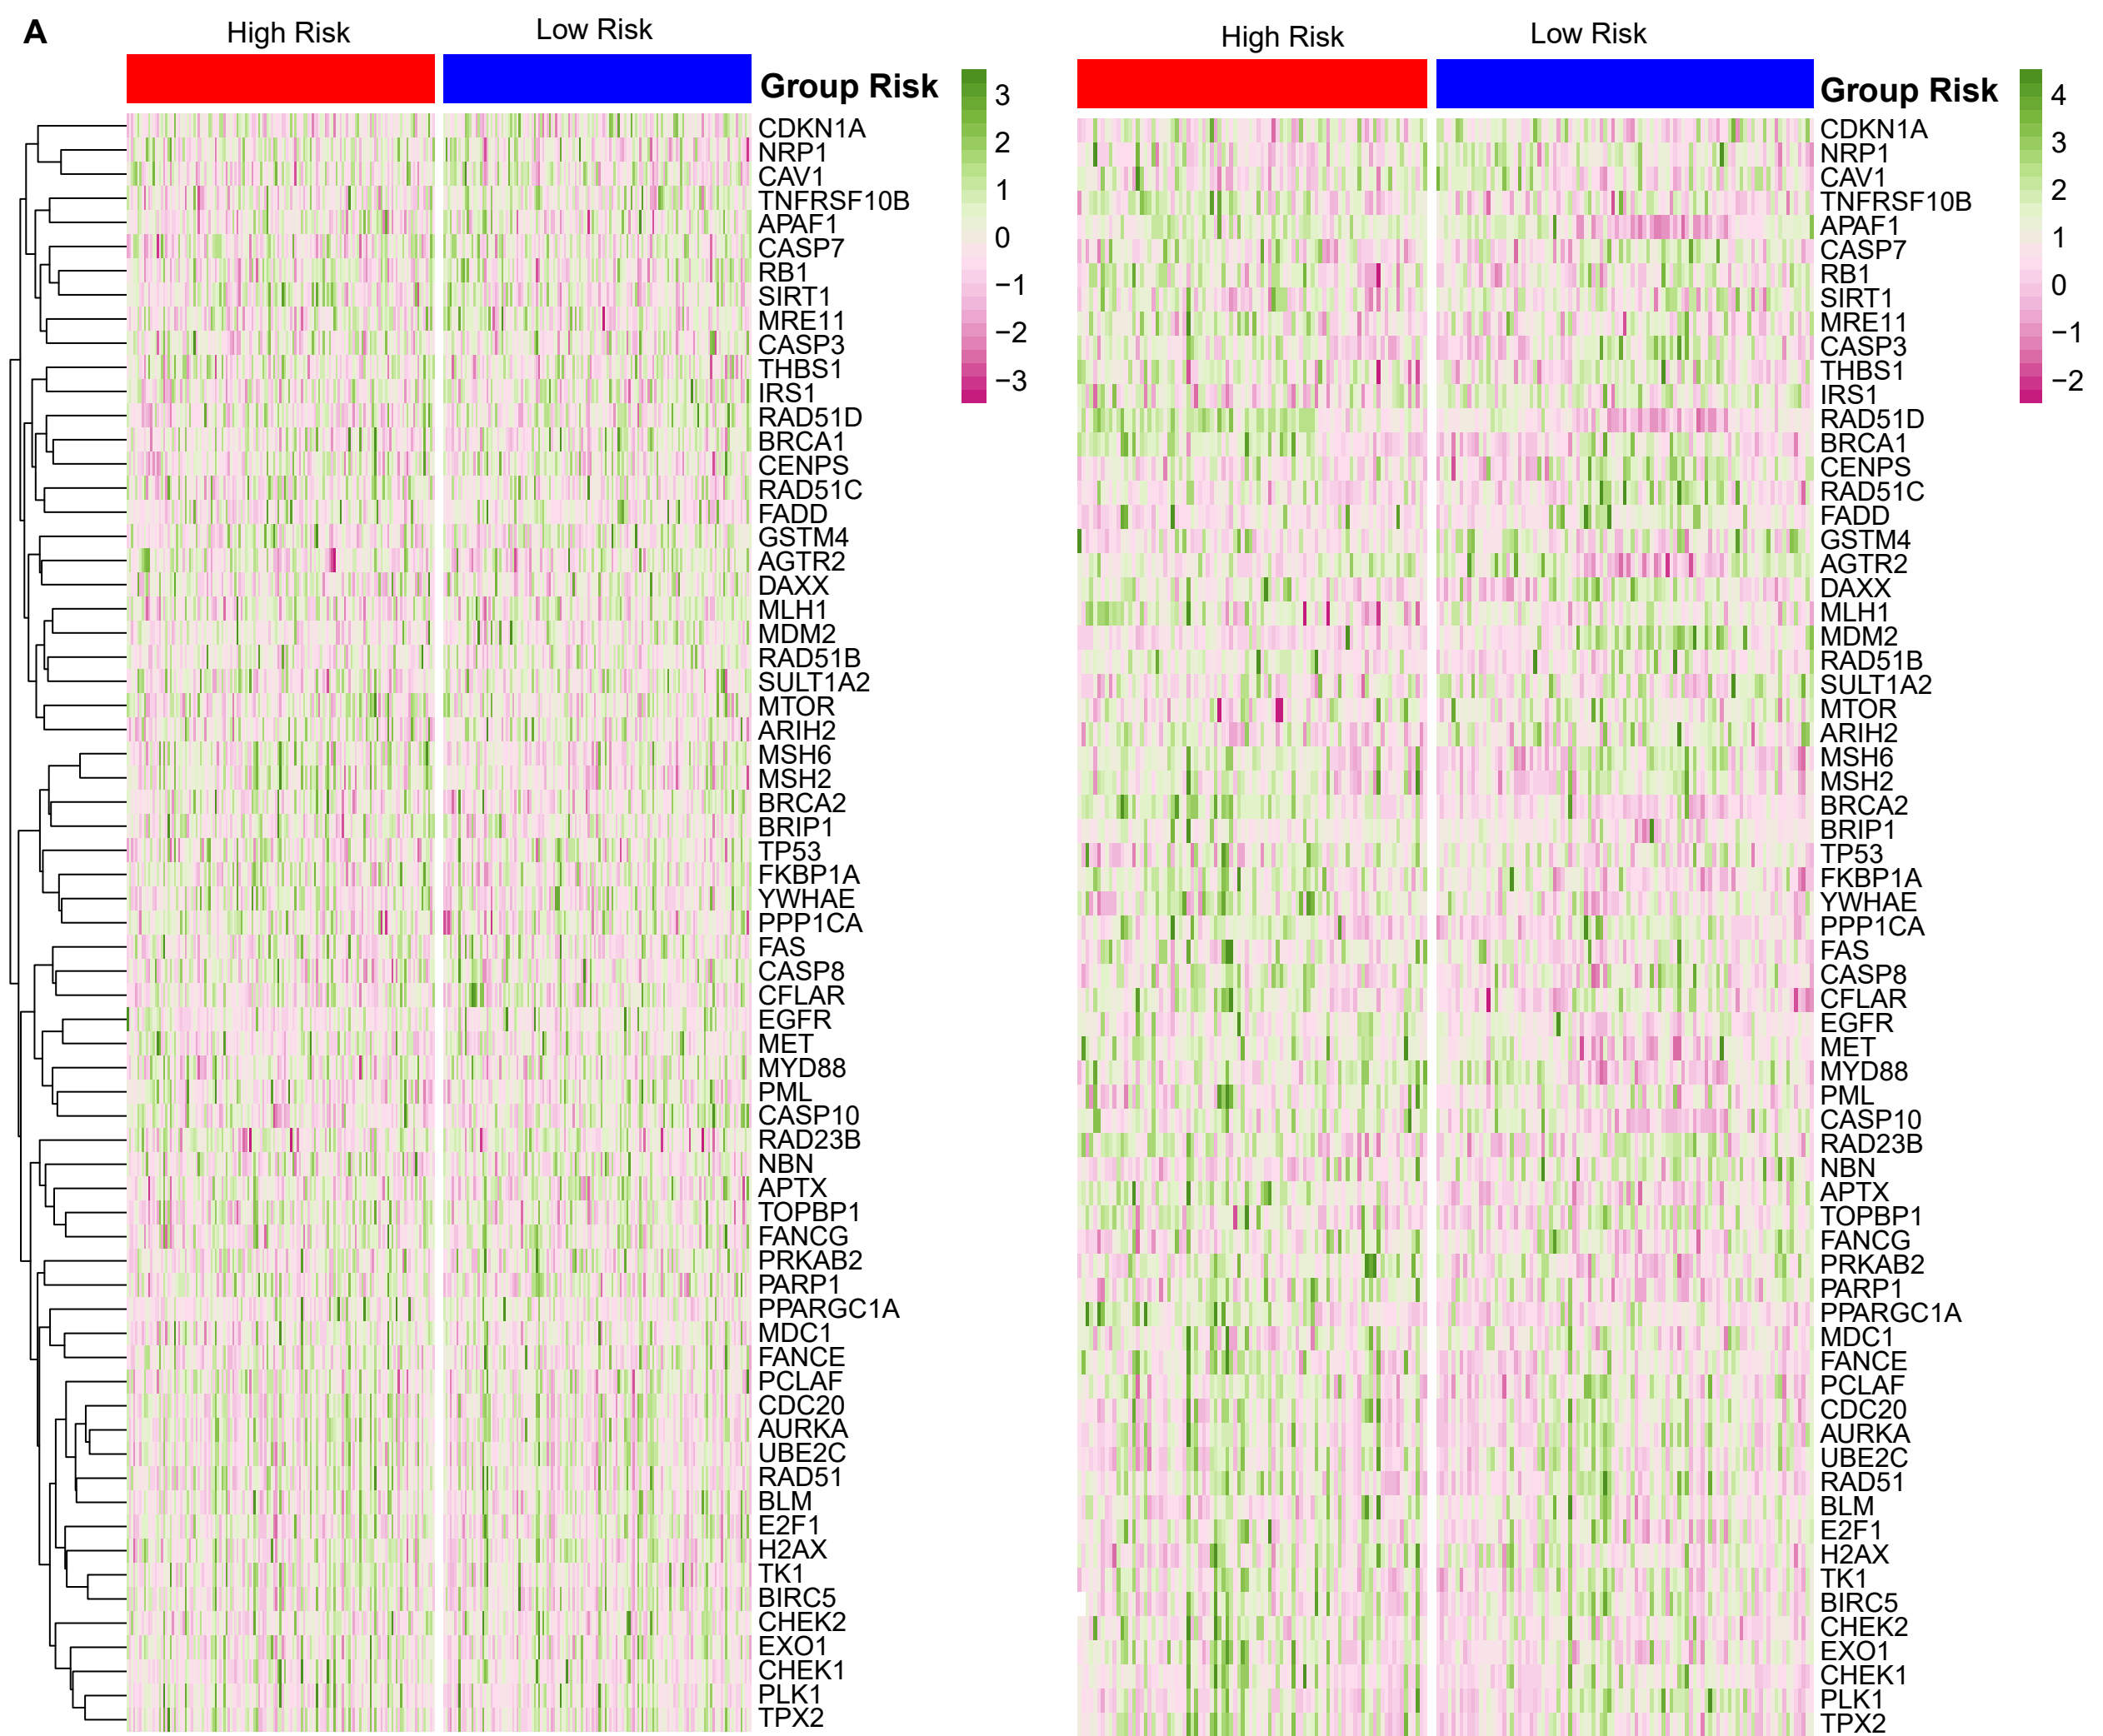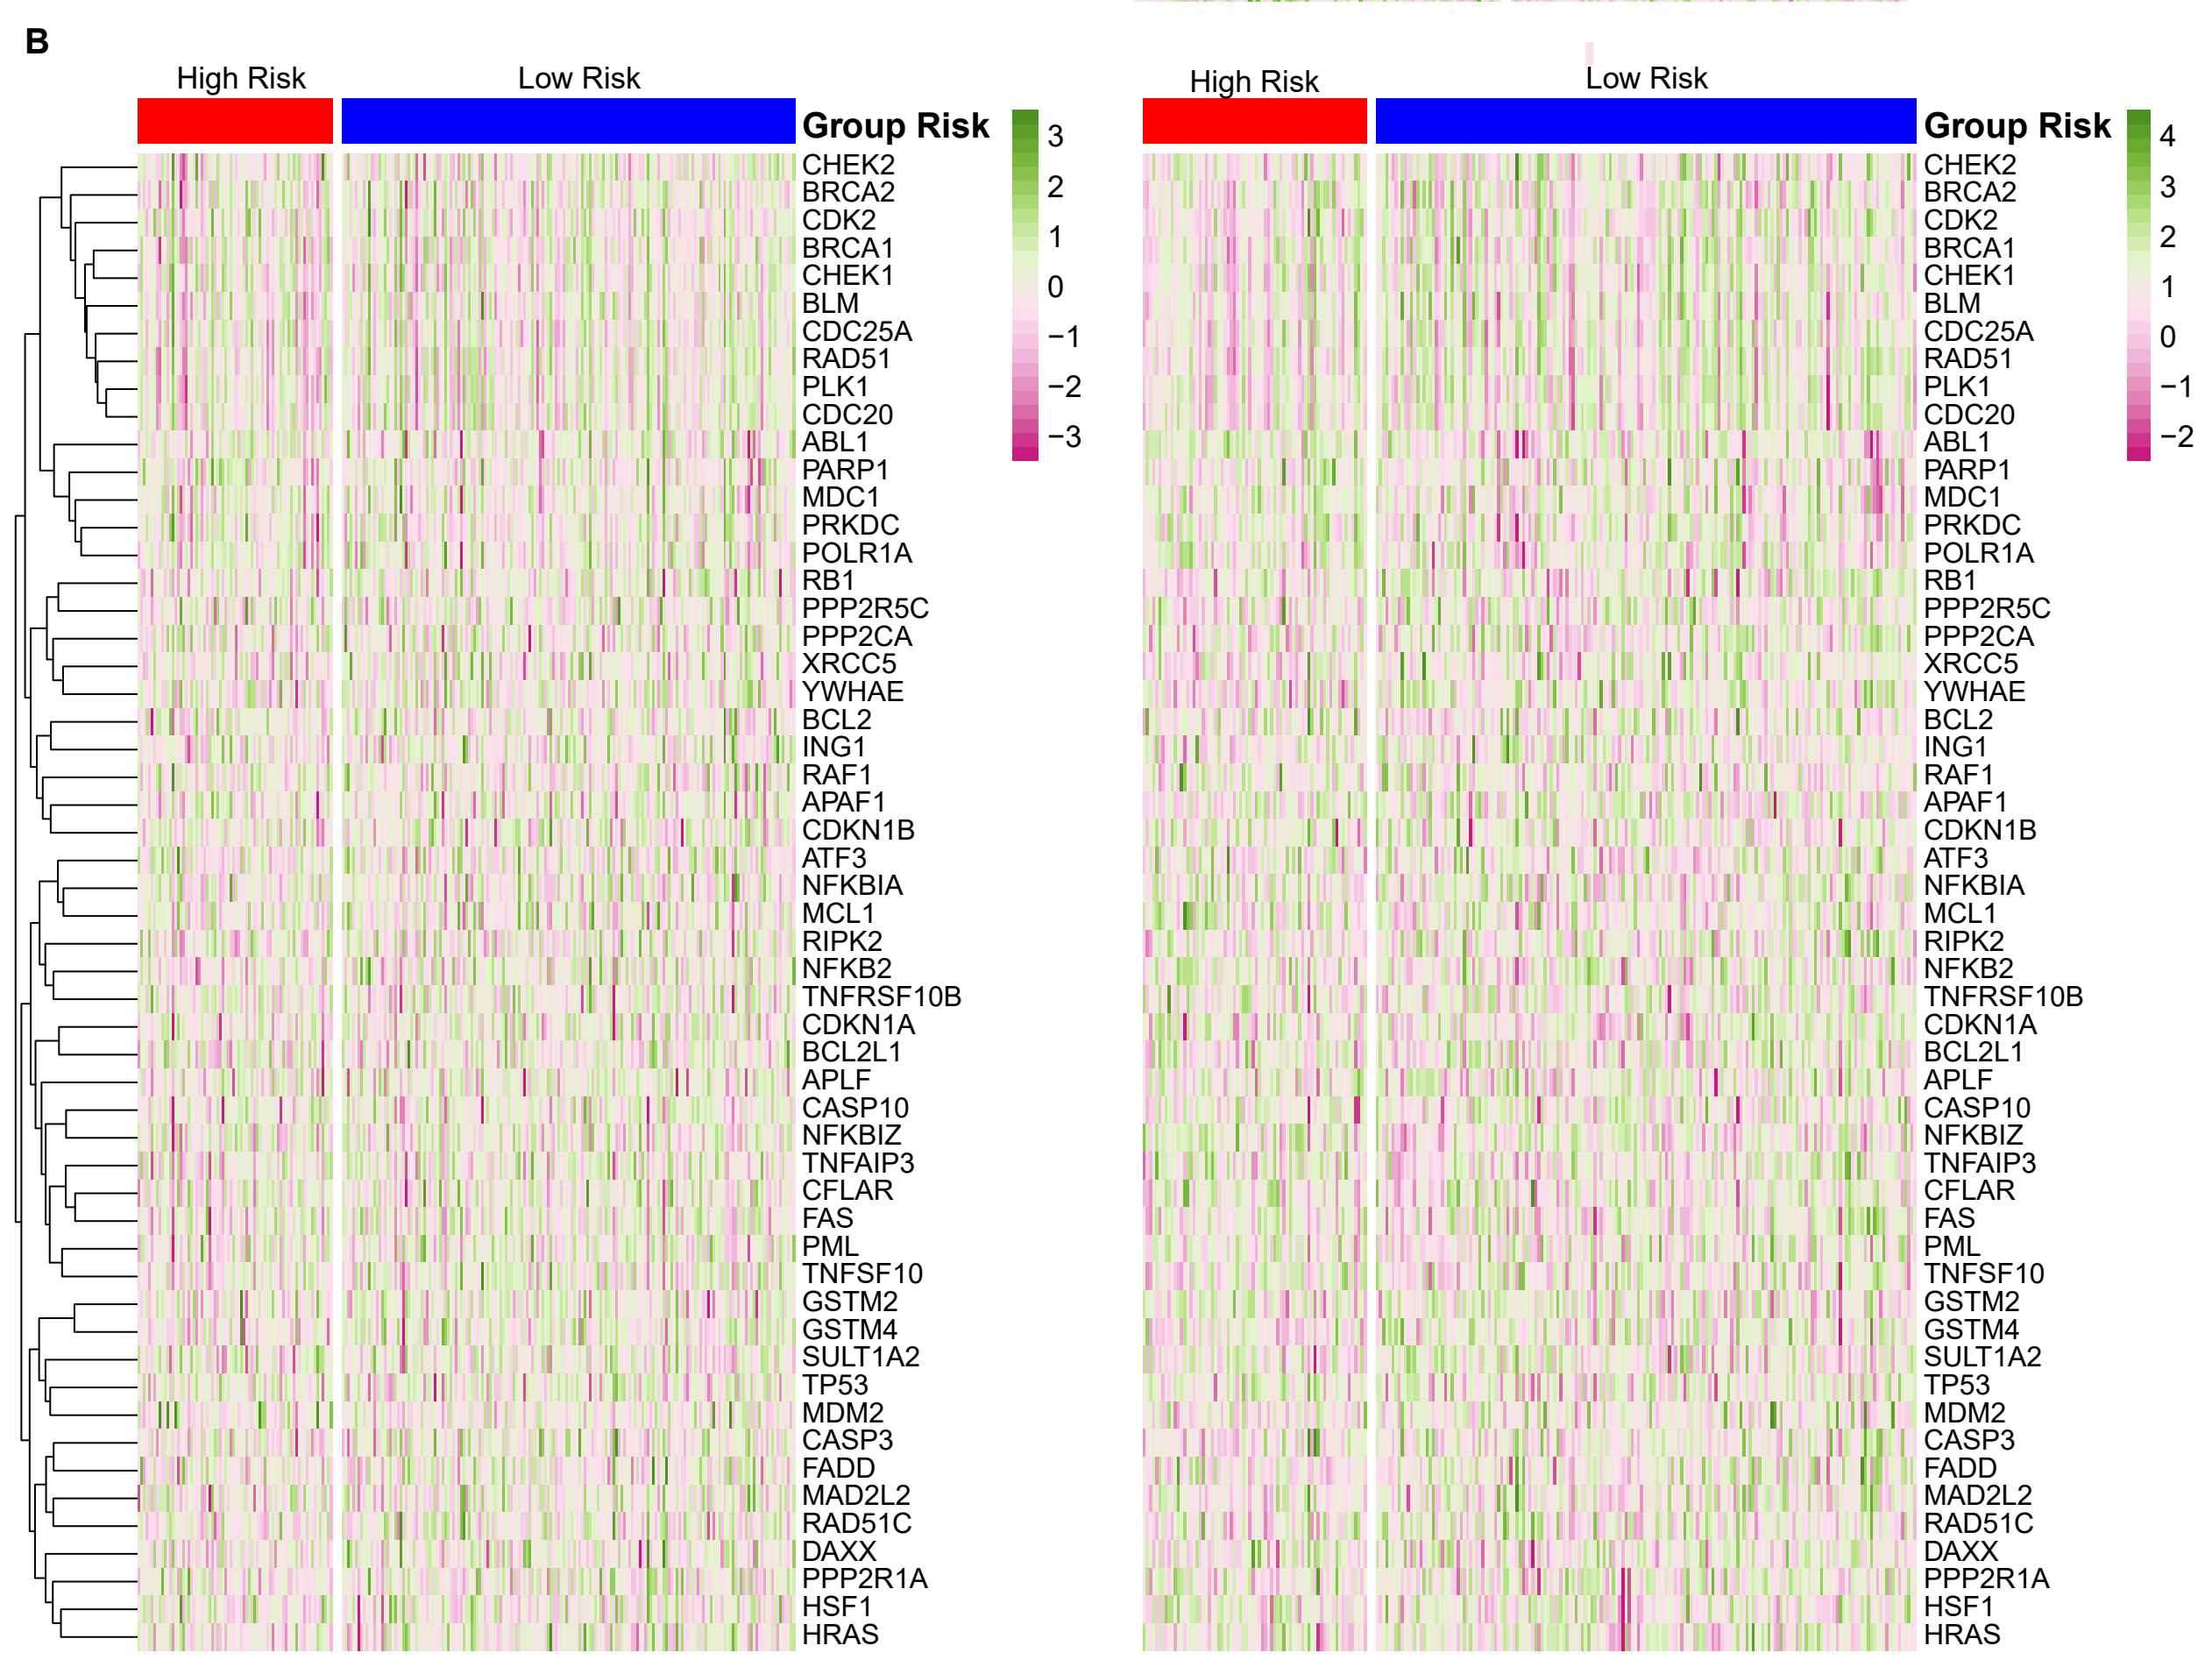

Supplement: s1 [file s1]

**A****Training set**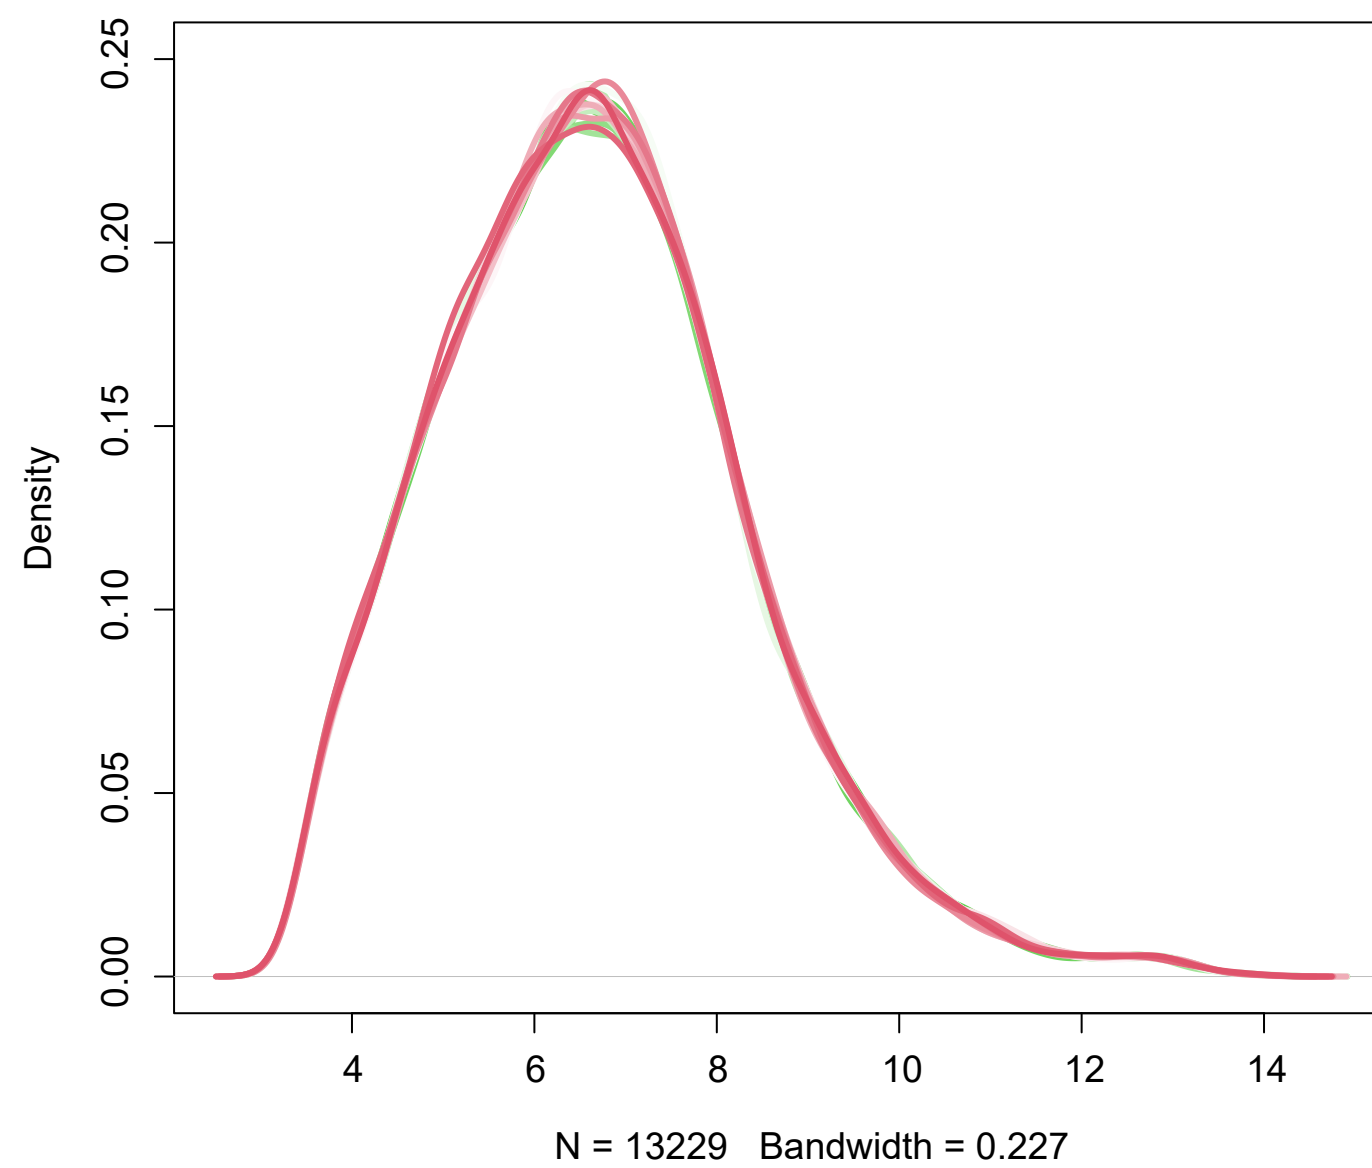**Testing set**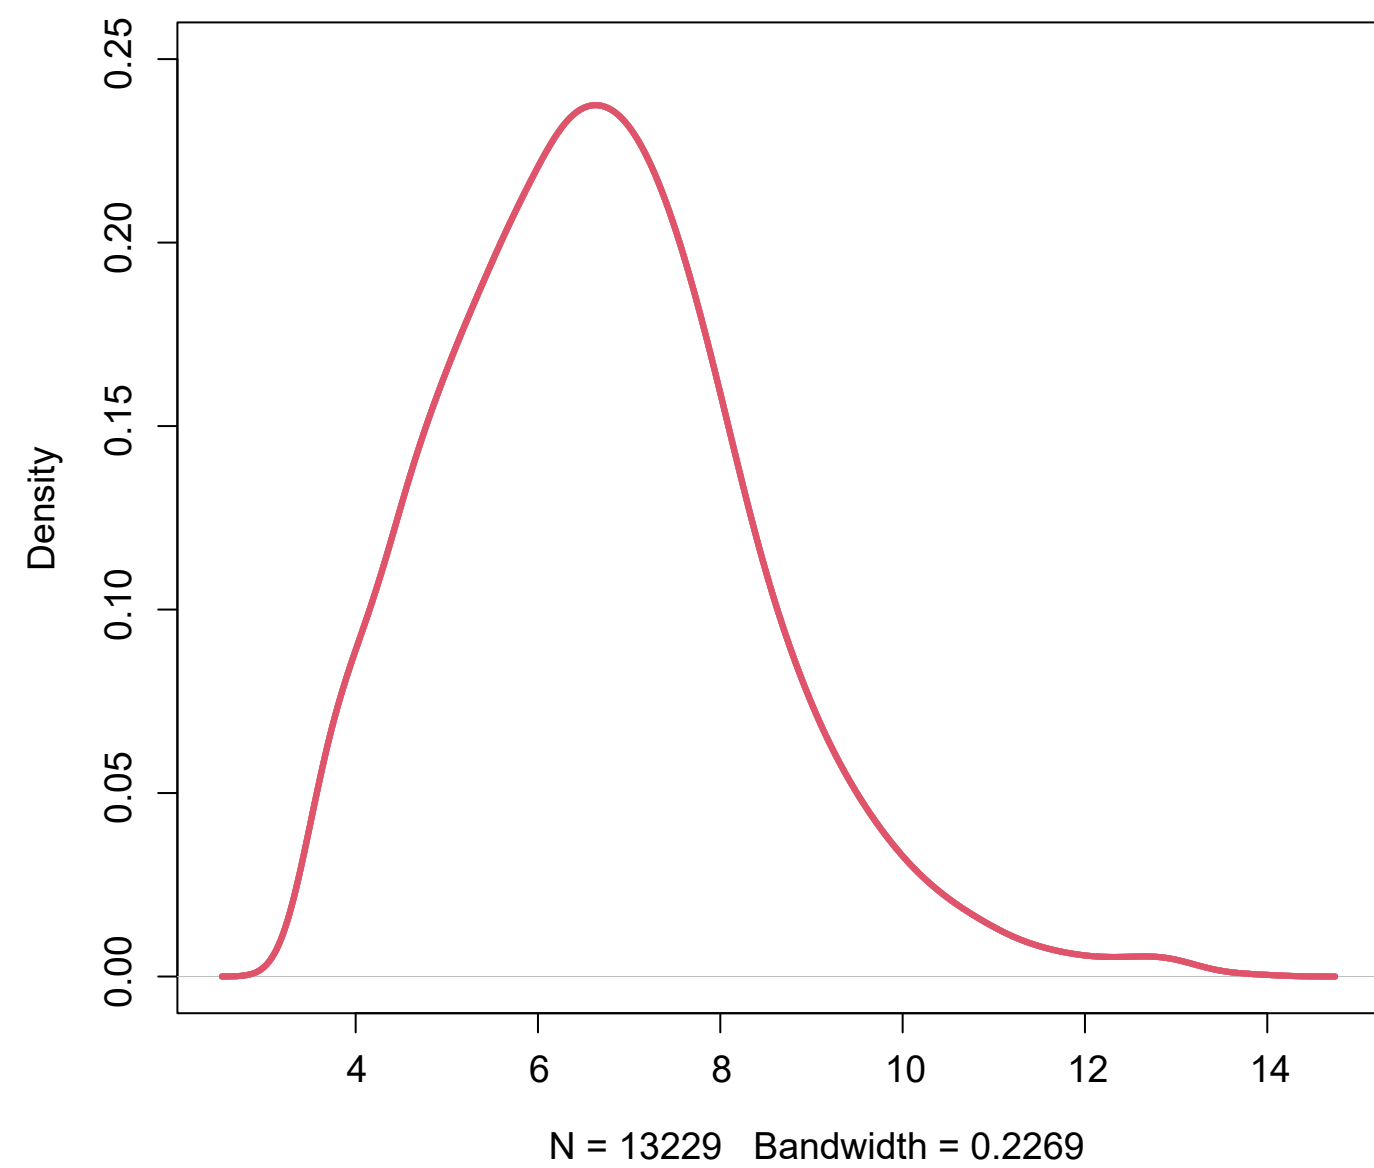**B****Training set**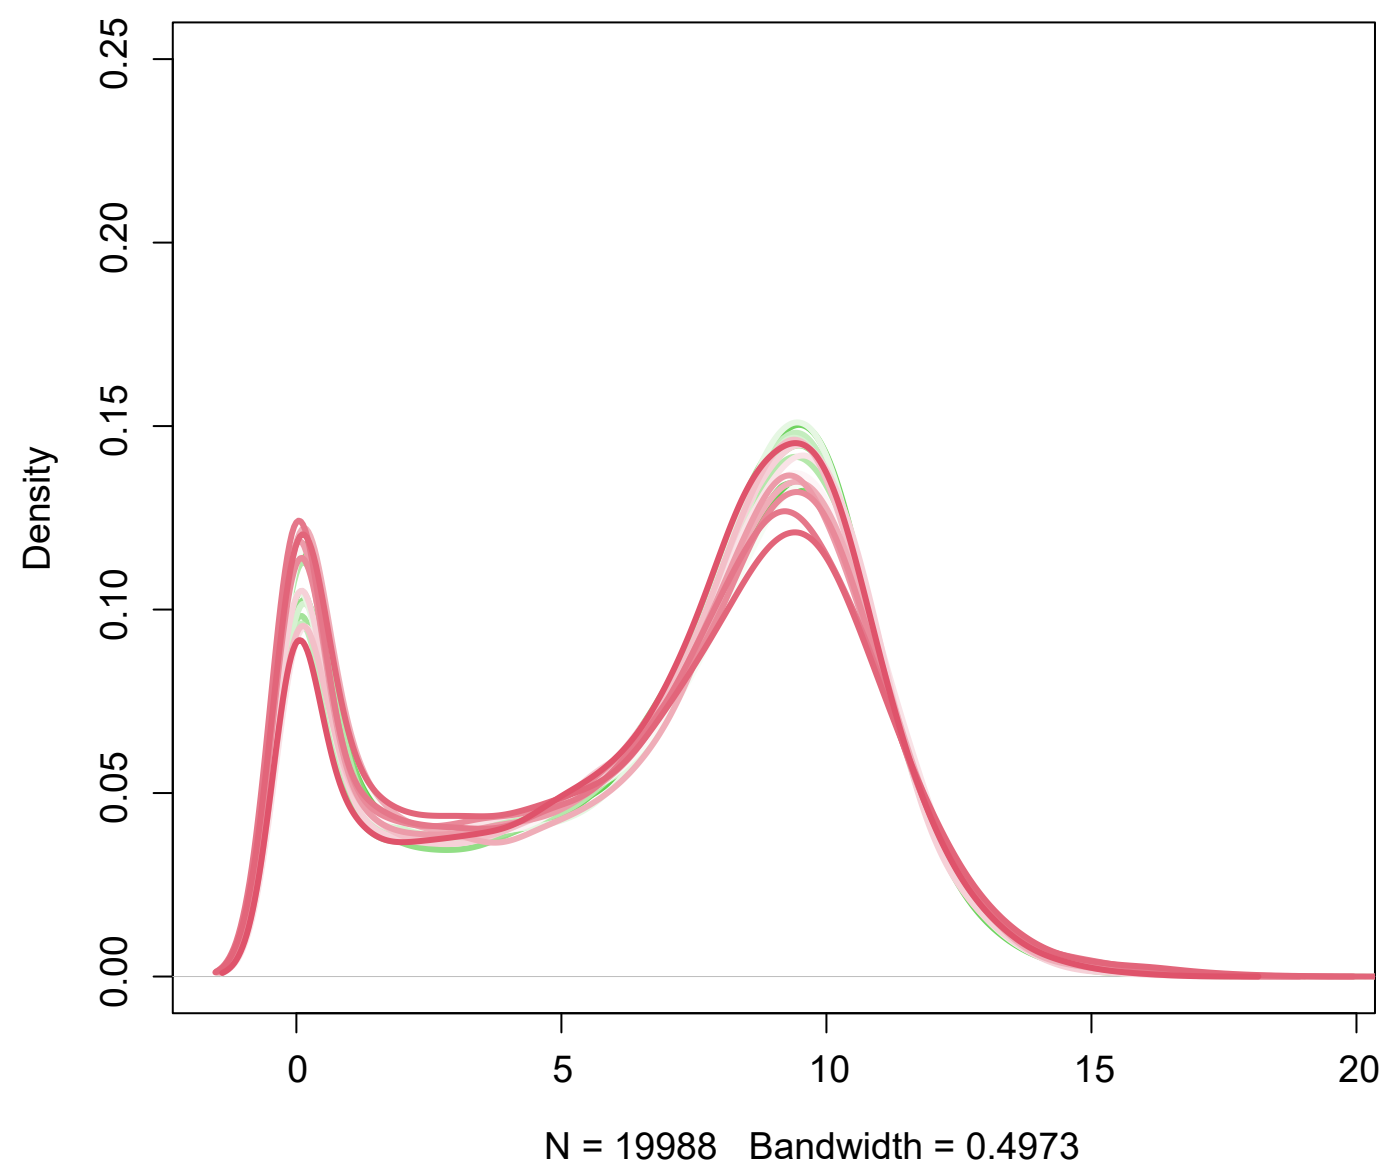**Testing set**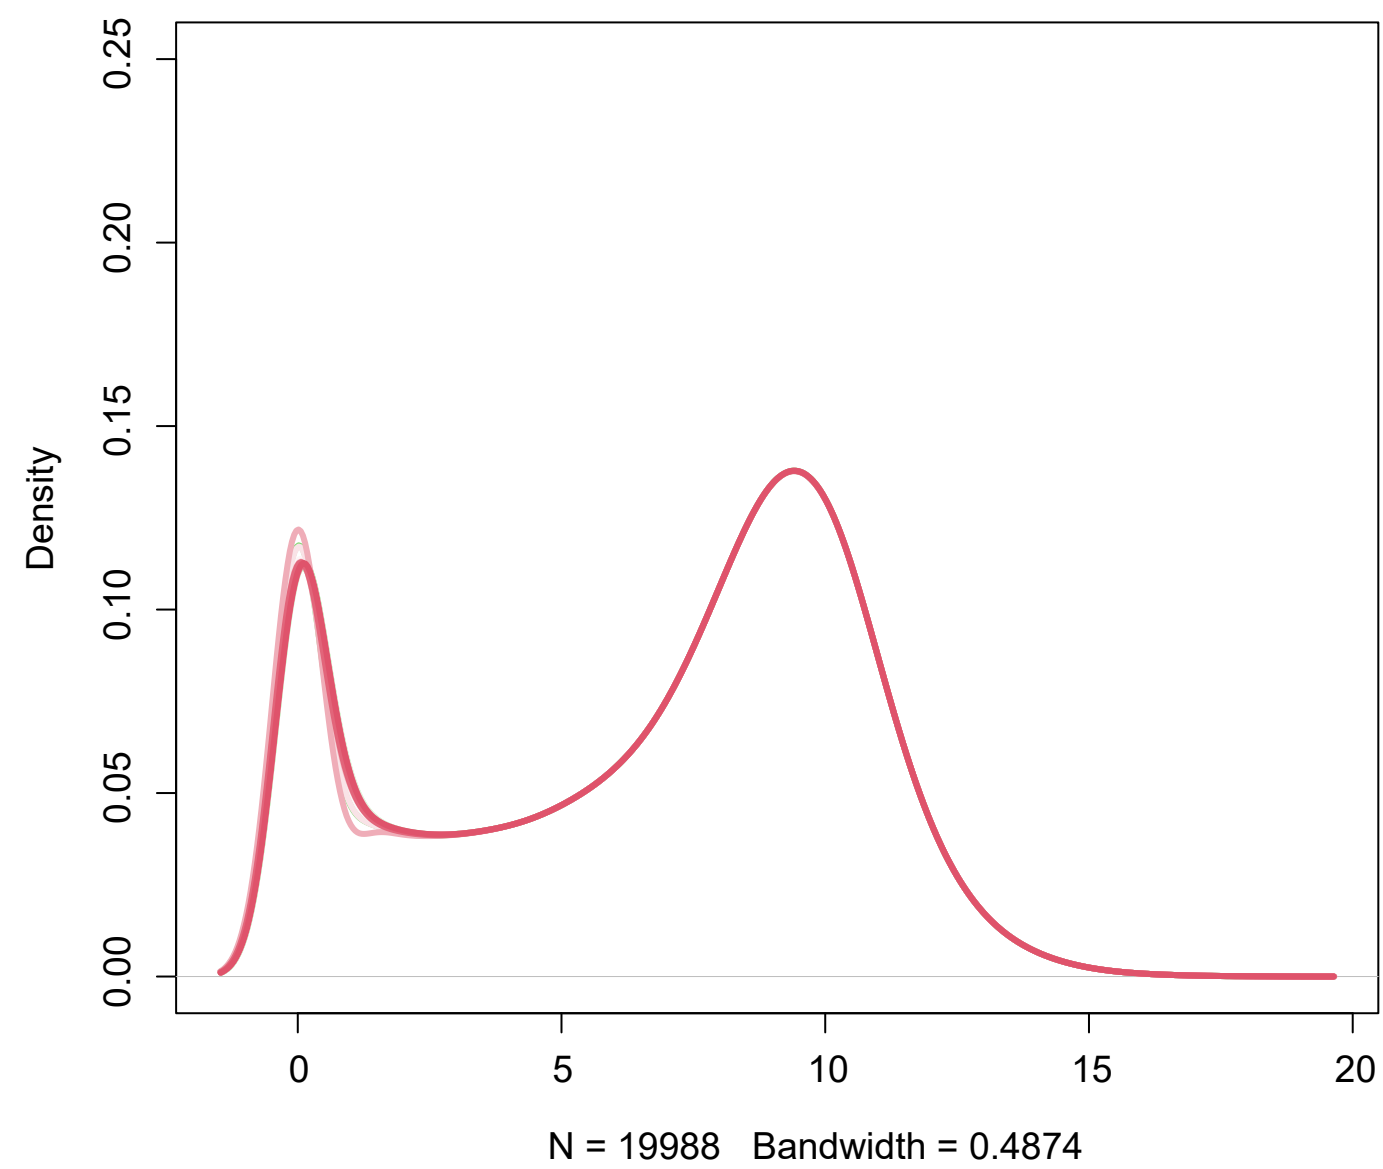

Supplement: s1 [file s1]
